# Supplementary material for: A prospective study comparing patient-reported outcomes in Crohn’s disease
Source: PubMed Central journal article supplement (PMC6903328; doi:10.1097/meg.0000000000001568), 2019-12-09

Supplemental figure 1. Overview of BSFS scores at baseline and after treatment. A decrease in diarrhea and severe diarrhea was observed after treatment.

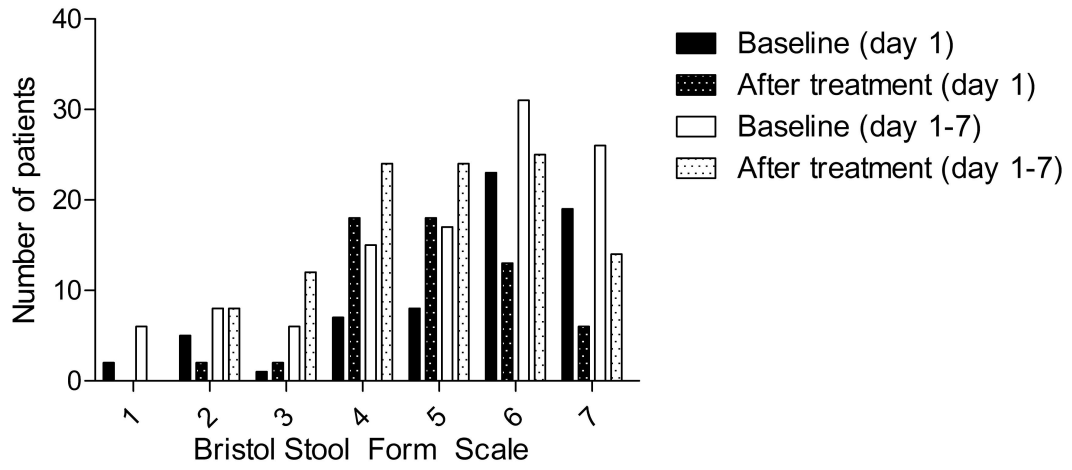

Supplement: ejgh-32-38-s002.pdf [file ejgh-32-38-s002.pdf]
